# Supplementary material for: Binary similarity measures for fingerprint analysis of qualitative metabolomic profiles
Source: Springer Nature journal article supplement (doi:10.1007/s11306-018-1327-y), 2018-01-31
Supplement: MOESM1 [file 11306_2018_1327_MOESM1_ESM.pdf]

Supplementary data for the article:

Rácz, A.; Andrić, F.; Bajusz, D.; Héberger, K. Binary Similarity Measures for Fingerprint Analysis of Qualitative Metabolomic Profiles. *Metabolomics* **2018**, *14* (3). <https://doi.org/10.1007/s11306-018-1327-y>

## SUPPLEMENTARY MATERIAL

Online resource 3

### Binary similarity measures for fingerprint analysis of qualitative metabolomic profiles

Anita Rácz<sup>1</sup>, Filip Andrić<sup>2,\*</sup>, Dávid Bajusz<sup>3</sup>, Károly Héberger<sup>1</sup>

<sup>1</sup> *Plasma Chemistry Research Group, Research Centre for Natural Sciences, Hungarian Academy of Sciences, H-1117 Budapest, Magyar tudósok krt. 2, Hungary;*

<sup>2</sup> *Faculty of Chemistry, University of Belgrade, Studentski trg 12-16, 11000 Belgrade, Serbia*

<sup>3</sup> *Medicinal Chemistry Research Group, Research Centre for Natural Sciences, Hungarian Academy of Sciences, H-1117 Budapest, Magyar tudósok krt. 2, Hungary*

\*To whom correspondence should be addressed:

Dr. Filip Andrić  
Assistant professor  
Department of Analytical Chemistry  
Faculty of Chemistry, University of Belgrade  
E-mail: [andric@chem.bg.ac.rs](mailto:andric@chem.bg.ac.rs)  
Phone: +381 11 3336 755

#### CONTENTS

|                                                                                                                            |        |
|----------------------------------------------------------------------------------------------------------------------------|--------|
| <b>Table OR1</b> Contingency table for a pair of samples                                                                   | p. 2   |
| <b>Table OR2</b> List of the binary similarity coefficients, their definitions, concordance symmetry and metric properties | p. 3-6 |

**Table OR1** Contingency table for a pair of samples, containing the frequencies of common present ( $a$ ), common absent ( $d$ ), and exclusive metabolites for Sample 1 ( $b$ ) and Sample 2 ( $c$ ).

| $p = a + b + c + d$ |                        | Sample 2               |                       |
|---------------------|------------------------|------------------------|-----------------------|
|                     |                        | 1 (metabolite present) | 0 (metabolite absent) |
| Sample 1            | 1 (metabolite present) | $a$                    | $b$                   |
|                     | 0 (metabolite absent)  | $c$                    | $d$                   |

**Table OR2.** List of the binary similarity coefficients, their definitions, concordance symmetry and metric properties. The notations and classification of similarity measures were kept the same as in the work of Todeschini *et al.* 2014

| No | Label | Name                           | Equation                                                             | Scaling parameters |         | Concordance symmetry | Metricity |
|----|-------|--------------------------------|----------------------------------------------------------------------|--------------------|---------|----------------------|-----------|
|    |       |                                |                                                                      | $\alpha$           | $\beta$ |                      |           |
| 1  | SM    | Simple matching, Sokal-Michner | $s_{SM} = \frac{a+d}{p}$                                             | 0                  | 1       | S                    | M         |
| 2  | RT    | Rogers-Tanimoto                | $s_{RT} = \frac{a+d}{p+b+c}$                                         | 0                  | 1       | S                    | M         |
| 3  | JT    | Jaccard-Tanimoto               | $s_{JT} = \frac{a}{a+b+c}$                                           | 0                  | 1       | A                    | M         |
| 4  | Gle   | Gleason                        | $s_{Gle} = \frac{2a}{2a+b+c}$                                        | 0                  | 1       | A                    | N         |
| 5  | RR    | Russel-Rao                     | $s_{RR} = \frac{a}{p}$                                               | 0                  | 1       | A                    | M         |
| 6  | For   | Forbes                         | $s_{For} = \frac{pa}{(a+b)(a+c)}$                                    | 0                  | $p/a$   | A                    | M         |
| 7  | Sim   | Simpson                        | $s_{Sim} = \frac{a}{\min\{(a+b), (a+c)\}}$                           | 0                  | 1       | A                    | N         |
| 8  | BB    | Braun-Blanquet                 | $s_{BB} = \frac{a}{\max\{(a+b), (a+c)\}}$                            | 0                  | 1       | A                    | M         |
| 9  | DK    | Driver-Kroeber, Ochiai, cosine | $s_{DK} = \frac{a}{\sqrt{(a+b)(a+c)}}$                               | 0                  | 1       | A                    | N         |
| 10 | BUB   | Baroni-Urbani-Buser            | $s_{BUB} = \frac{\sqrt{ad} + a}{\sqrt{ad} + a + b + c}$              | 0                  | 1       | I                    | M         |
| 11 | Kul   | Kulczynski                     | $s_{Kul} = \frac{1}{2} \left( \frac{a}{a+b} + \frac{a}{a+c} \right)$ | 0                  | 1       | A                    | N         |
| 12 | SS1   | Sokal-Sneath (1)               | $s_{SS1} = \frac{a}{a+2b+2c}$                                        | 0                  | 1       | A                    | M         |

| No | Label | Name             | Equation                                                                | Scaling parameters |               | Concordance symmetry | Metricity |
|----|-------|------------------|-------------------------------------------------------------------------|--------------------|---------------|----------------------|-----------|
|    |       |                  |                                                                         | $\alpha$           | $\beta$       |                      |           |
| 13 | SS2   | Sokal-Sneath (2) | $s_{SS2} = \frac{2a+2d}{p+a+d}$                                         | 0                  | 1             | S                    | N         |
| 14 | Ja    | Jaccard          | $s_{Ja} = \frac{3a}{3a+b+c}$                                            | 0                  | 1             | A                    | N         |
| 15 | Fai   | Faith            | $s_{Fai} = \frac{a+0.5d}{p}$                                            | 0                  | 1             | I                    | M         |
| 16 | Mou   | Mountford        | $s_{Mou} = \frac{2a}{ab+ac+2bc}$                                        | 0                  | 2             | A                    | M         |
| 17 | Mic   | Michael          | $s_{Mic} = \frac{4(ad-bc)}{(a+d)^2+(b+c)^2}$                            | 1                  | 2             | Q                    | N         |
| 18 | RG    | Rogot-Goldberg   | $s_{RG} = \frac{a}{2a+b+c} + \frac{d}{2d+b+c}$                          | 0                  | 1             | S                    | M         |
| 19 | HD    | Hawkins-Dotson   | $s_{HD} = \frac{1}{2} \left( \frac{a}{a+b+c} + \frac{d}{b+c+d} \right)$ | 0                  | 1             | S                    | M         |
| 20 | Yu1   | Yule (1)         | $s_{Yu1} = \frac{ad-bc}{ad+bc}$                                         | 1                  | 2             | Q                    | N         |
| 21 | Yu2   | Yule (2)         | $s_{Yu2} = \frac{\sqrt{ad}-\sqrt{bc}}{\sqrt{ad}+\sqrt{bc}}$             | 1                  | 2             | Q                    | M         |
| 22 | Fos   | Fossum           | $s_{Fos} = \frac{p(a-0.5)^2}{(a+b)(a+c)}$                               | 1                  | $(p-0.5^2)/p$ | A                    | M         |
| 23 | Den   | Dennis           | $s_{Den} = \frac{ad-bc}{\sqrt{p(a+b)(a+c)}}$                            | $(p/2)^{1/2}$      | $p^{1/2}$     | Q                    | M         |
| 24 | Co1   | Cole (1)         | $s_{Co1} = \frac{ad-bc}{(a+c)(c+d)}$                                    | $p-1$              | $p$           | Q                    | N         |
| 25 | Co2   | Cole (2)         | $s_{Co2} = \frac{ad-bc}{(a+b)(b+d)}$                                    | $p-1$              | $p$           | Q                    | N         |
| 26 | dis   | Dispersion       | $s_{dis} = \frac{ad-bc}{p^2}$                                           | 1/4                | 1/2           | Q                    | N         |

| No | Label | Name                                  | Equation                                                                                             | Scaling parameters |         | Concordance symmetry | Metricity |
|----|-------|---------------------------------------|------------------------------------------------------------------------------------------------------|--------------------|---------|----------------------|-----------|
|    |       |                                       |                                                                                                      | $\alpha$           | $\beta$ |                      |           |
| 27 | GK    | Goodman-Kruskal                       | $s_{GK} = \frac{2 \min(a, d) - b - c}{2 \min(a, d) + b + c}$                                         | 1                  | 2       | S                    | N         |
| 28 | SS3   | Sokal-Sneath (3)                      | $s_{SS3} = \frac{1}{4} \left( \frac{a}{a+b} + \frac{a}{a+c} + \frac{d}{b+d} + \frac{d}{c+d} \right)$ | 0                  | 1       | S                    | M         |
| 29 | SS4   | Sokal-Sneath (4)                      | $s_{SS4} = \frac{ad}{\sqrt{(a+b)(a+c)(b+d)(c+d)}}$                                                   | 0                  | 1       | S                    | M         |
| 30 | Phi   | Pearson-Heron colligation coefficient | $s_{Phi} = \frac{ad - bc}{\sqrt{(a+b)(a+c)(c+d)(b+d)}}$                                              | 1                  | 2       | Q                    | M         |
| 31 | Di1   | Dice (1)                              | $s_{Di1} = \frac{a}{a+b}$                                                                            | 0                  | 1       | A                    | N         |
| 32 | Di2   | Dice (2)                              | $s_{Di2} = \frac{a}{a+c}$                                                                            | 0                  | 1       | A                    | N         |
| 33 | Sor   | Sorgenfrei                            | $s_{Sor} = \frac{a^2}{(a+b)(a+c)}$                                                                   | 0                  | 1       | A                    | N         |
| 34 | Coh   | Cohen                                 | $s_{Coh} = \frac{2(ad - bc)}{(a+b)(b+d) + (a+c)(c+d)}$                                               | 1                  | 2       | Q                    | N         |
| 35 | Pe1   | Peirce (1)                            | $s_{Pe1} = \frac{ad - bc}{(a+b)(c+d)}$                                                               | 1                  | 2       | Q                    | N         |
| 36 | Pe2   | Peirce (2)                            | $s_{Pe2} = \frac{ad - bc}{(a+c)(b+d)}$                                                               | 1                  | 2       | Q                    | N         |
| 37 | MP    | Maxwell-Pilliner                      | $s_{MP} = \frac{2(ad - bc)}{(a+b)(c+d) + (a+c)(b+d)}$                                                | 1                  | 2       | Q                    | M         |
| 38 | HL    | Harris-Lahey                          | $s_{HL} = \frac{a(2d+b+c)}{2(a+b+c)} + \frac{d(2a+b+c)}{2(b+c+d)}$                                   | 0                  | $p$     | S                    | N         |
| 39 | CT1   | Consoni-Todeschini (1)                | $s_{CT1} = \frac{\ln(1+a+d)}{\ln(1+p)}$                                                              | 0                  | 1       | S                    | M         |

| No | Label | Name                   | Equation                                               | Scaling parameters |         | Concordance symmetry | Metricity |
|----|-------|------------------------|--------------------------------------------------------|--------------------|---------|----------------------|-----------|
|    |       |                        |                                                        | $\alpha$           | $\beta$ |                      |           |
| 40 | CT2   | Consoni-Todeschini (2) | $s_{CT2} = \frac{\ln(1+p) - \ln(1+b+c)}{\ln(1+p)}$     | 0                  | 1       | S                    | N         |
| 41 | CT3   | Consoni-Todeschini (3) | $s_{CT3} = \frac{\ln(1+a)}{\ln(1+p)}$                  | 0                  | 1       | A                    | N         |
| 42 | CT4   | Consoni-Todeschini (4) | $s_{CT4} = \frac{\ln(1+a)}{\ln(1+a+b+c)}$              | 0                  | 1       | A                    | N         |
| 43 | CT5   | Consoni-Todeschini (5) | $s_{CT5} = \frac{\ln(1+ad) - \ln(1+bc)}{\ln(1+p^2/4)}$ | 0                  | 1       | S                    | M         |
| 44 | AC    | Austin-Colwell         | $s_{AC} = \frac{2}{\pi} \arcsin \sqrt{\frac{a+d}{p}}$  | 0                  | 1       | S                    | M         |
